# Supplementary material
Source: HighWire-hosted journal article supplement (https://cmaj.ca/highwire/filestream/58673/field_highwire_adjunct_files/0/image-zheng-1-at.pdf)

**Appendix 1:** Histopathologic findings from a skin biopsy taken from the left forearm of a 69-year-old man with linear psoriasis, showing hyperkeratosis (white arrow), parakeratosis, Munro microabscesses (black arrow), attenuation of the granular cell layer and regular elongation of the rete ridges (\*). (Hematoxylin–eosin stain, original magnification  $\times 100$ .)

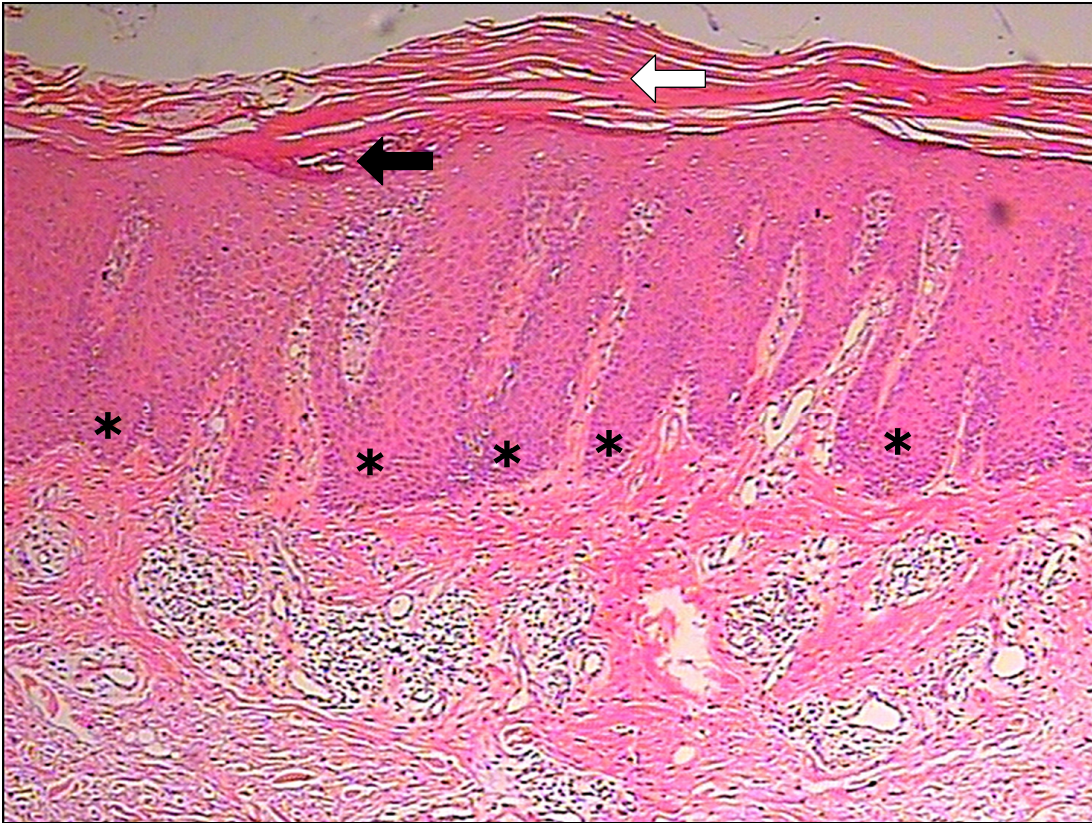

Supplement: image-zheng-1-at.pdf [file image-zheng-1-at.pdf]
